# Supplementary material for: Adenylsuccinate Synthetase MoADE12 Plays Important Roles in the Development and Pathogenicity of the Rice Blast Fungus
Source: MDPI journal article supplement (doi:10.3390/jof8080780), 2022-07-26
Supplement: s1 [file s1]

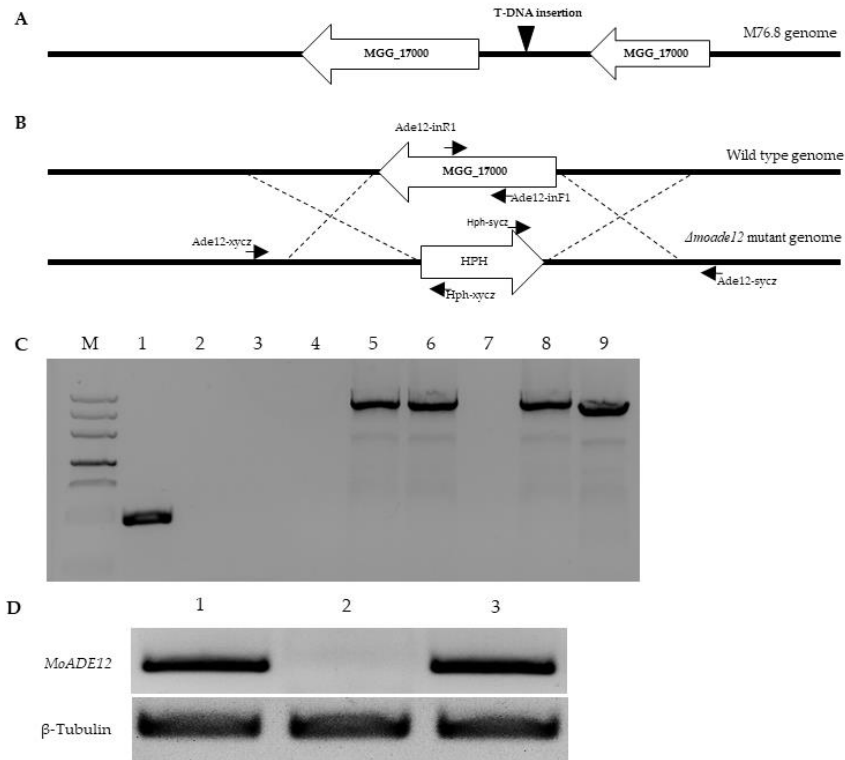

**Figure S1.** Generation of the *MoADE12* deletion mutants and the complement transformants. (A) Insertion site of T-DNA in the mutant M76.8 (B) Schematic diagram of *MoADE12* gene knockout. The 2.6-kb fragment including the *MoADE12* coding region was replaced with the hygromycin B (*hph*) cassette by homologous recombination. (C) PCR screening for gene knockout mutants. Lane M: DNA Marker III (Tiangen, Beijing, China). Lane 1-3: PCR amplification products using primer pairs *Ade12-inF1/Ade12-inR1*. Lane 4-6: PCR amplification products using primer pairs *Ade12-sycz/Hph-sycz*. Lane 7-9: PCR amplification products using primer pairs *Ade12-xycz/Hph-xycz*. Lane 1, 4 and 7: Guy11; Lane 2, 5 and 8: the *Δmoade12* mutant; Lane 3, 6 and 9: Another one of the *MoADE12* gene knockout mutants. (D) Expression of *MoADE12* gene in mycelia of tested strains. Lane 1: Guy11, Lane 2: the *Δmoade12* mutant, Lane 3: the reintroduction mutant *Δmoade12/MoADE12*.

**Table. S1** Primers used in this study

| Primers    | Sequence: 5'-3'                                      | Comments                                                               |
|------------|------------------------------------------------------|------------------------------------------------------------------------|
| Ade12-uF   | cacacattattatggagaaactcgagtcacactgaactattcaccgaactg  | pKO-MoADE12 construction                                               |
| Ade12-uR   | gtaccgagctcgaattcgtaatccattggtttatcttgctgctacctg     |                                                                        |
| Ade12-dF   | cctctagagtcgacctgcaggcagtgaaacttgctttatcgcacaaagacg  | pKO-MoADE12 construction                                               |
| Ade12-dR   | gtaaaacgacggccagtgccaagcttctctccaccaagtcactagtatagtc |                                                                        |
| Ade12-comF | cagctatgaccatgattacgaattcacactgaactattcaccgaactg     | pBAR-Ade12R construction                                               |
| Ade12-comR | aacgacggccagtgccaagctcaaggtctgatacaacgcagcgctcg      |                                                                        |
| Ade12-inF1 | acaacttacgtaggccttcaca                               | For <i>MoADE12</i> gene complementation construction                   |
| Ade12-inR1 | cgcattctcggaagtctttga                                |                                                                        |
| Ade12-sycz | acgcgtgcaaacacagtacc                                 | Identification of recombination events in the $\Delta moade12$ mutants |
| Hph-sycz   | cgtgcaccaagcagcagatg                                 |                                                                        |
| Ade12-xycz | ctgcaggtctcttaccgat                                  | Identification of recombination events in the $\Delta moade12$ mutants |
| Hph-xycz   | cttggttgacggcaattcg                                  |                                                                        |
| Ade12q-F1  | ggggatgaaggcaaggga                                   | <i>MoADE12</i> gene expression analysis                                |
| Ade12q-R1  | gccgatcaggttcacgca                                   |                                                                        |
| Tub-F1     | ggccaatgcggcaaccaa                                   | MGG_00604 gene expression analysis                                     |
| Tub-R1     | aggacagcacgggaaca                                    |                                                                        |
